# Supplementary material
Source: Springer Nature journal article supplement (https://www.springermedizin.de/resource/supplementary/12936_2013_3025_MOESM10_ESM.pdf/9544848)

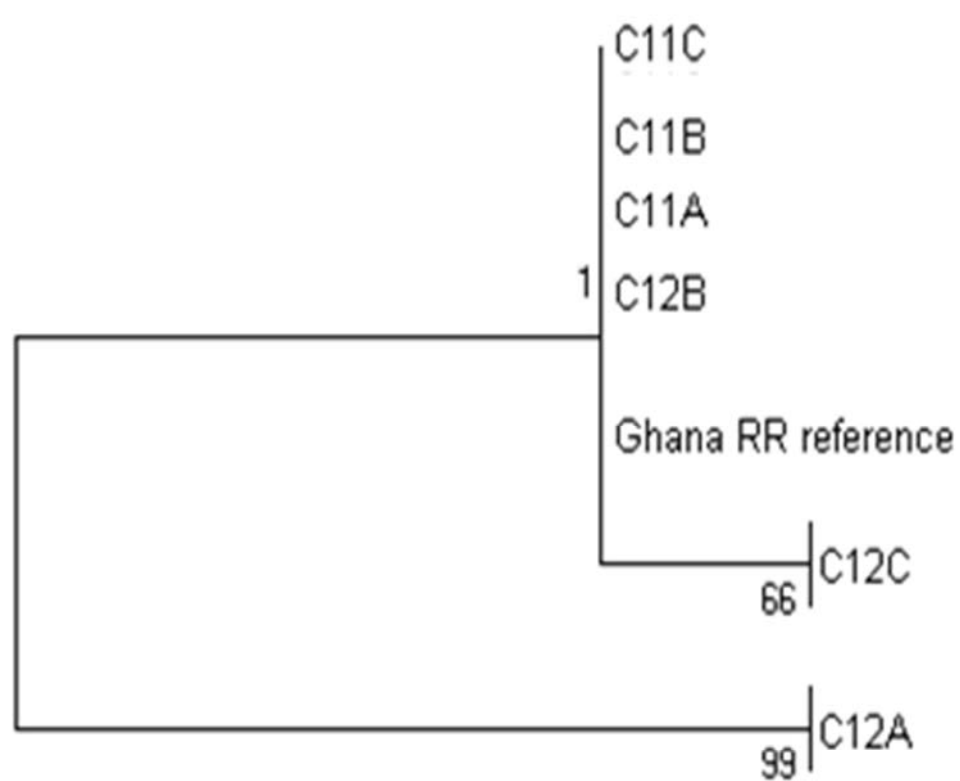

0.001

Supplement: MOESM10 [file 9544848]
